# Supplementary material
Source: PubMed Central journal article supplement (PMC7324087)
Supplement: mmc1.pdf [file mmc1.pdf]

# THE LANCET

## Global Health

### Supplementary appendix

This appendix formed part of the original submission. We post it as supplied by the authors.

Supplement to: Chandir S, Siddiqi DA, Setayesh H, Khan AJ. Impact of COVID-19 lockdown on routine immunisation in Karachi, Pakistan. *Lancet Glob Health* 2020; published online June 29. [http://dx.doi.org/10.1016/S2214-109X\(20\)30290-4](http://dx.doi.org/10.1016/S2214-109X(20)30290-4).

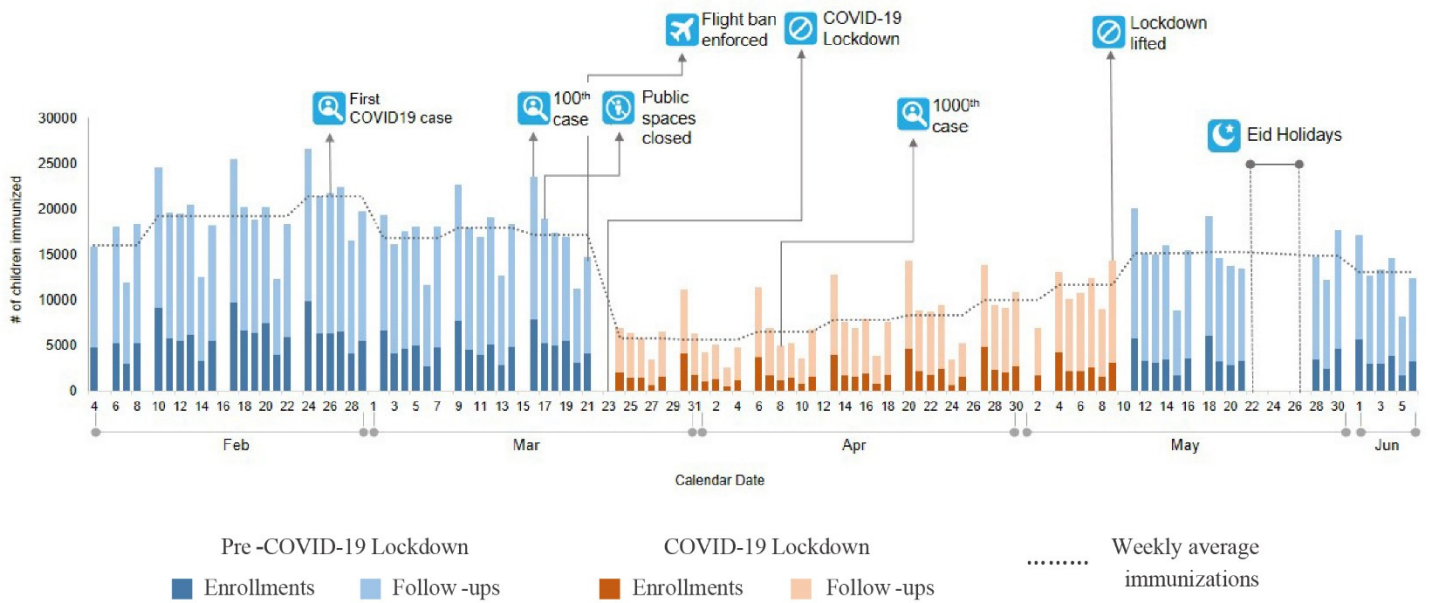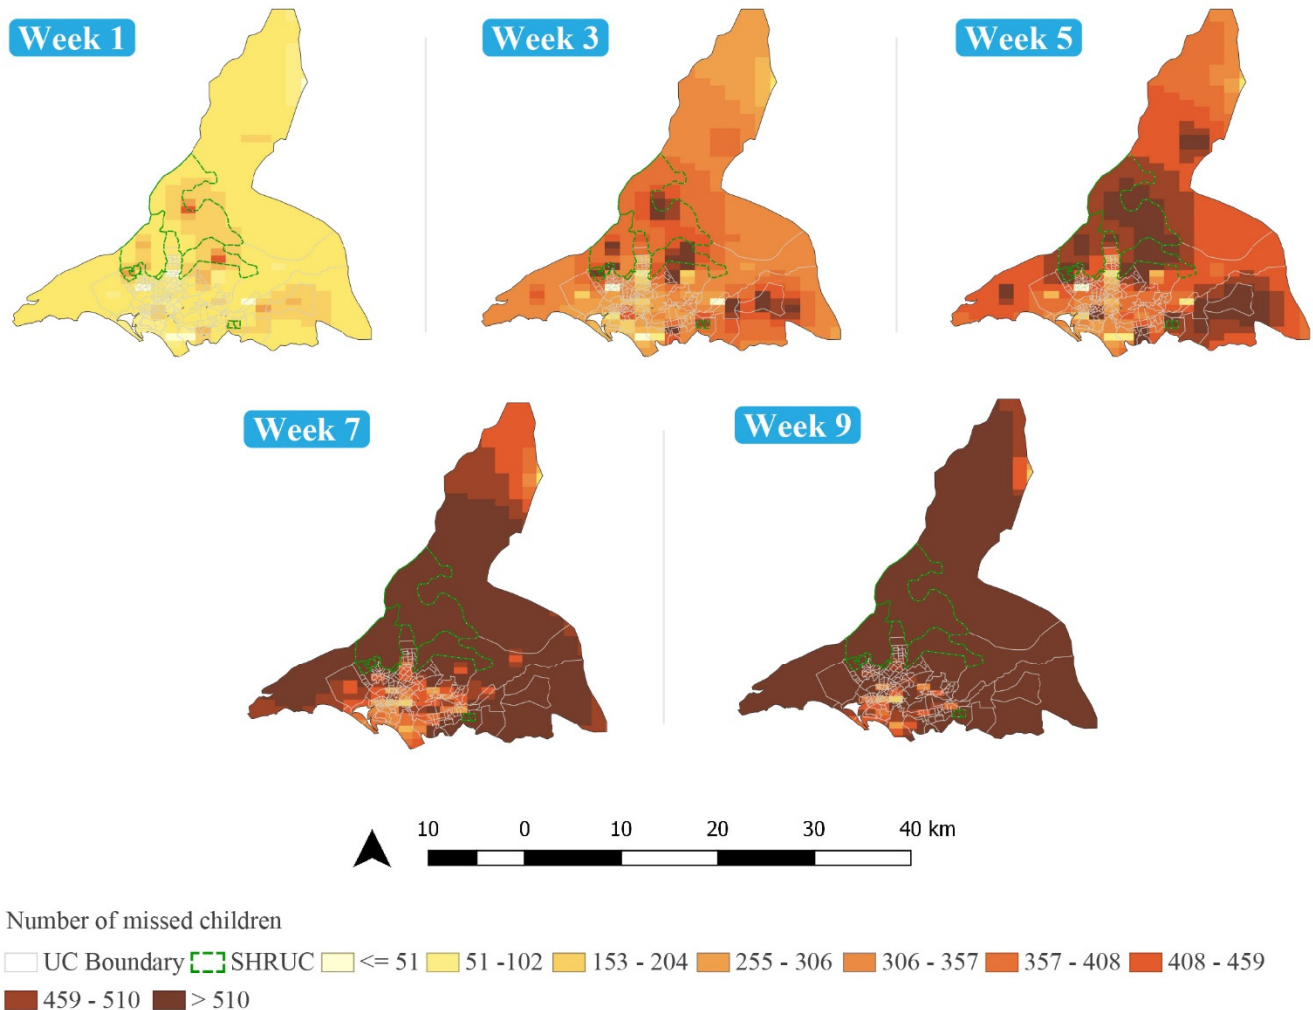

Supplementary Figure 1b: Weekly cumulative distribution of 0-23 month old children (geocoded at enrollment visit) who missed immunization follow-up visits during and after COVID-19 lockdown (March 23-June 06, 2020) in Karachi (n=108,350)

Supplementary Table 1: Average daily number of vaccine doses administered to 0-23 months children by fixed and outreach vaccination services in Karachi, Sindh in ZM EIR during baseline (Sep 23, 2019 - Mar 22, 2020), and percentage reduction during COVID-19 lockdown (Mar 23-May 9, 2020) and post COVID-19 lockdown (May 10-Jun 6, 2020) periods compared to baseline in Sindh, Pakistan (n=2,872,336)

| Vaccines     | Baseline period (n=2,383,586) |              |               | COVID-19 lockdown (n=286,450) |            |              |                      |             |             | Post-COVID-19 lockdown (n=202,300) |              |               |                      |             |             |
|--------------|-------------------------------|--------------|---------------|-------------------------------|------------|--------------|----------------------|-------------|-------------|------------------------------------|--------------|---------------|----------------------|-------------|-------------|
|              | Average Number of doses       |              |               | Average Number of doses       |            |              | Percentage reduction |             |             | Average Number of doses            |              |               | Percentage reduction |             |             |
|              | Fixed                         | Outreach     | Total         | Fixed                         | Outreach   | Total        | Fixed                | Outreach    | Total       | Fixed                              | Outreach     | Total         | Fixed                | Outreach    | Total       |
|              | n                             | n            | n             | n                             | n          | n            | %                    | %           | %           | n                                  | n            | n             | %                    | %           | %           |
| BCG          | 736                           | 440          | 1,176         | 451                           | 36         | 487          | 38.7                 | 91.9        | 58.6        | 651                                | 172          | 823           | 11.5                 | 60.9        | 30.0        |
| OPV-0        | 589                           | 215          | 804           | 368                           | 25         | 393          | 37.5                 | 88.3        | 51.1        | 542                                | 117          | 659           | 8.0                  | 45.7        | 18.1        |
| Penta-1      | 774                           | 413          | 1,187         | 425                           | 42         | 467          | 45.1                 | 89.9        | 60.7        | 557                                | 168          | 725           | 28.0                 | 59.4        | 38.9        |
| OPV-1        | 776                           | 417          | 1,193         | 425                           | 41         | 466          | 45.2                 | 90.1        | 60.9        | 559                                | 169          | 727           | 28.0                 | 59.6        | 39.1        |
| PCV-1        | 774                           | 412          | 1,186         | 425                           | 42         | 467          | 45.1                 | 89.8        | 60.7        | 557                                | 168          | 725           | 28.1                 | 59.3        | 38.9        |
| Rota-1       | 765                           | 405          | 1,170         | 422                           | 42         | 464          | 44.8                 | 89.7        | 60.4        | 551                                | 165          | 716           | 28.0                 | 59.2        | 38.8        |
| Penta-2      | 701                           | 342          | 1,043         | 427                           | 42         | 469          | 39.1                 | 87.7        | 55.0        | 495                                | 157          | 652           | 29.4                 | 54.1        | 37.5        |
| OPV-2        | 701                           | 341          | 1,042         | 428                           | 42         | 470          | 39.0                 | 87.6        | 54.9        | 496                                | 157          | 653           | 29.3                 | 53.9        | 37.3        |
| PCV-2        | 700                           | 342          | 1,042         | 427                           | 42         | 469          | 38.9                 | 87.8        | 55.0        | 494                                | 157          | 651           | 29.4                 | 54.1        | 37.5        |
| Rota-2       | 683                           | 328          | 1,011         | 421                           | 41         | 462          | 38.4                 | 87.6        | 54.3        | 486                                | 152          | 638           | 28.9                 | 53.6        | 36.9        |
| Penta-3      | 651                           | 290          | 941           | 434                           | 37         | 472          | 33.3                 | 87.2        | 49.9        | 496                                | 162          | 659           | 23.7                 | 44.1        | 30.0        |
| OPV-3        | 652                           | 289          | 941           | 435                           | 38         | 473          | 33.2                 | 87.0        | 49.7        | 497                                | 162          | 659           | 23.8                 | 44.0        | 30.0        |
| PCV-3        | 680                           | 325          | 1,005         | 441                           | 39         | 480          | 35.2                 | 88.0        | 52.3        | 508                                | 167          | 675           | 25.3                 | 48.8        | 32.9        |
| IPV          | 651                           | 289          | 939           | 434                           | 37         | 472          | 33.2                 | 87.0        | 49.8        | 497                                | 162          | 659           | 23.6                 | 43.8        | 29.8        |
| Measles1     | 494                           | 263          | 757           | 351                           | 36         | 387          | 29.0                 | 86.3        | 48.9        | 478                                | 168          | 645           | 3.4                  | 36.2        | 14.8        |
| Measles2     | 368                           | 192          | 560           | 242                           | 23         | 265          | 34.3                 | 88.0        | 52.7        | 275                                | 108          | 382           | 25.3                 | 43.8        | 31.7        |
| <b>Total</b> | <b>10,695</b>                 | <b>5,302</b> | <b>15,997</b> | <b>6,557</b>                  | <b>604</b> | <b>7,161</b> | <b>38.7</b>          | <b>88.6</b> | <b>55.2</b> | <b>8,138</b>                       | <b>2,509</b> | <b>10,647</b> | <b>23.9</b>          | <b>52.7</b> | <b>33.4</b> |

Abbreviations: Bacille Calmette-Guérin (BCG), Oral polio vaccine (OPV), Pentavalent (Penta), Pneumococcal conjugate vaccine (PCV), Rotavirus (Rota), Inactivated poliovirus vaccine (IPV).
